# Supplementary material for: The Mindfulness Manifold: Exploring How Self-Preoccupation, Self-Compassion, and Self-Transcendence Translate Mindfulness Into Positive Psychological Outcomes
Source: Springer Nature journal article supplement (doi:10.1007/s12671-018-0959-3), 2018-05-15
Supplement: MOESM1 [file 15766950]

Supplementary materials


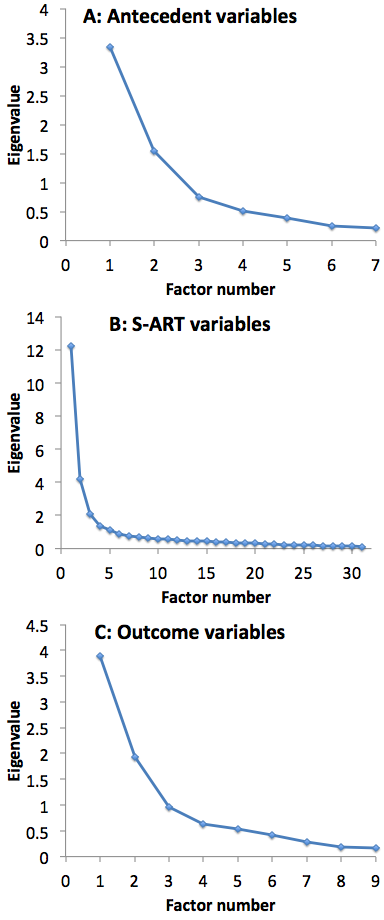


Figure S1. Scree plots for the three exploratory factor analyses performed on a subset (*n* = 448) of the sample; principal axis factoring. Panel A: Antecedent variables; Panel B: S-ART variables; Panel C: outcome variables.
